# Supplementary material for: Variations of the atmospheric polycyclic aromatic hydrocarbon concentrations, sources, and health risk and the direct medical costs of lung cancer around the Bohai Sea against a background of pollution prevention and control in China
Source: Copernicus journal article supplement (doi:10.5194/acp-24-1509-2024), 2024-01-31
Supplement: Supplementary file 1 [file acp-24-1509-2024-supplement.pdf]

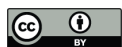

*Supplement of*

**Variations of the atmospheric polycyclic aromatic hydrocarbon concentrations, sources, and health risk and the direct medical costs of lung cancer around the Bohai Sea against a background of pollution prevention and control in China**

**Wenwen Ma et al.**

*Correspondence to:* Rong Sun (rsun@yic.ac.cn) and Chongguo Tian (cgtian@yic.ac.cn)

The copyright of individual parts of the supplement might differ from the article licence.

## Supplementary Information (SI)

### S1. Calculation method of uncertainty input file

The uncertainty of the variables was calculated based on the method detection limit (MDL) and the concentration of each sample:

(1) for samples of which concentration lower than MDL, 5/6 of MDL was used as the corresponding uncertainty (Kim et al., 2004);

(2) for samples of which concentration higher than MDL, the uncertainty was calculated as following (Chueinta et al., 2000):

$$\sigma_{ij} = \frac{\text{MDL}}{3} + cx_{ij} \quad (\text{S1})$$

where  $\sigma_{ij}$  is the uncertainty, MDL is the Method Detection Limit,  $x_{ij}$  is the concentration of the  $i$ th variable in the  $j$ th sample.  $c$  is the constant (0.1 when  $x_{ij} > 3\text{MDL}$ , 0.2 when  $x_{ij} < 3\text{MDL}$ ).

### S2. Positive Matrix Factorization (PMF)

PMF analyses involve many details about the development of the data, decisions of what data to include/exclude, determination of a solution, and evaluation of robustness of that solution; reporting of PMF solutions and analyses vary widely. The profiles obtained from the modeling must have physically meaningful results, i.e., there must be evidence of the potential sources in the study area. The analysis of the Q value (indicates the agreement of the model fit;) and the  $r^2$  value (indicates the correlation between measured and estimated concentrations) can help to determine the best number of factors to be chosen for modeling (Wang et al., 2009). In this study, during the PMF analysis, the model was run for 3-7 factors and was always with random seeds. Finally, the five-factor solution was found to be ideal from 200 random bootstrapping and gave the most stable results and the most easily physically interpretable factors. The Q value (both robust and true) produced by this solution is close to the theoretical Q value, indicating that the PAHs data set in the modeling input provides appropriate uncertainty. The diagnostic regression  $R^2$  value for the overall concentration of 228 samples is 0.9458, which is almost the same as the ratio of the predicted concentration of PMF to the measured concentration (Figure S6). It shows that the model results are good and

can be used as the basis for identifying the source of the target species. The  $r^2$  values also show a good correlation, and the values of the scaled residuals were in the recommended range (-1.5 to +1.5). These parameters indicate that the modeling has provided good fitting results and that there was no significant outlier.

### **S3. Source identification**

Factor 1 accounted for 9.4% of the  $\Sigma_{15}$  PAHs, the main load was HMW-PAHs such as BaP (85.0%), InD (84.5%), BghiP (46.8%), which was similar to the composition profile of vehicle emissions (He et al., 2008). BghiP and InD are regarded as markers of gasoline engines (Wu et al., 2014). In addition, the Fla/(Fla+Pyr) and InD/(InD+BghiP) of factor 1 were 0.30 and 0.50, respectively, the value less than 0.5 indicates that the main contribution came from vehicle exhaust (Characteristic PAH molecular diagnostic ratios were shown in Table S13 of SI). Therefore, factor 1 was interpreted gasoline vehicle emissions.

Factor 2 contributed 10.8% of the  $\Sigma_{15}$  PAHs, it was principally enriched the LMW-PAHs, Acy (57.6%) and Ace (77.4%). The composition of this factor was similar to the emission profiles of thermal power plant, steel plants and coking plants reported in the literature (Kong et al., 2013). Actually, there were industrial activities occurring in surrounding areas of the sites, such as sites in Tianjin, Liaoning, and Hebei Province. The inter-regional propagation of air masses has a great impact on the local concentration and distribution of PAHs in the air (Ma et al., 2010; Zhu et al., 2014) because of atmospheric diffusion and transport. Therefore, this factor was regarded as industrial processes.

Factor 3 accounted for the highest contribution of 49.6% of the  $\Sigma_{15}$  PAHs, it exhibited high loadings of Phe (93.8%), Ant (98.2%), Flu (62.5%) and moderate loadings of BaA (48.0%), Fla (26.2%), which corresponded to the profiles of incomplete combustion of coal (Huang et al., 2014; Chen et al., 2016). The ratios of Fla/(Fla+Pyr) and InD/(InD+BghiP) were 0.64 and 0.56, respectively, both greater than 0.5, and showed the characteristics of coal combustion emissions. Therefore, factor 3 was inferred to the coal combustion.

Factor 4 contributed 22.0%. Fla (59.3%) and Pyr (86.9%) are the dominant species, and moderate loadings of Chr (43.5%), which was similarly to the biomass emission components, such as straw, grass, wood (Shen et al., 2013; Ray et al., 2017). Maize and wheat are the two main crops in this area, and Fla and Pyr were the representative species of PAHs produced by straw burning (Jenkins et al., 1996). Therefore, factor 4 was identified as biomass burning.

Similarly to factor 1, factor 5 (8.2%) was mainly characterized by HMW-PAHs, which are recommended to be substantially emitted by diesel engines (Guariero et al., 2014). Factor 5 exhibited high loadings of BbF (80.2%), BkF (71.8%), DahA (57.4%), BaA (47.2%). BbF and BkF were regarded as characteristic compounds of diesel emissions (Zhu et al., 2003; Riddle et al., 2007; He et al., 2008), the diesel vehicle or ship exhaust was considered to have high loading of BkF. And the Fla/(Fla+Pyr) and InD/(InD+Bghip) of factor 5 were 0.48 and 0.20, respectively, that was suggested to the diesel exhaust (Gong et al., 2018). Therefore, factor 5 was respectively classified as diesel vehicle exhaust.

**Table S1.** Sampling information for 12 sampling sites (geographical location and sampling days)

| Year | Sampling Sites     | Beihuang | Dalian | Donggang | Dongying | Gaizhou | Longkou | Laoting | Rongcheng | Tianjin | Xingcheng | Yantai | Zhuanghe |
|------|--------------------|----------|--------|----------|----------|---------|---------|---------|-----------|---------|-----------|--------|----------|
|      | Abbr.              | BH       | DL     | DG       | DY       | GZ      | LK      | LT      | RC        | TJ      | XC        | YT     | ZH       |
|      | Longitude (E)      | 120.92   | 121.53 | 123.89   | 118.92   | 122.16  | 120.27  | 119.06  | 122.69    | 117.44  | 120.58    | 121.43 | 122.99   |
|      | Latitude (N)       | 38.4     | 38.87  | 39.85    | 37.5     | 40.25   | 37.69   | 39.34   | 37.39     | 38.84   | 40.47     | 37.59  | 39.64    |
| 2014 | Summer             | -        | 76     | 80       | 69       | 92      | -       | 79      | 87        | 75      | 77        | 71     | 77       |
| 2014 | Autumn             | 91       | 89     | 90       | 92       | 74      | 93      | 91      | 94        | 115     | 90        | 93     | 67       |
| 2014 | Winter             | -        | 98     | 84       | 92       | 88      | 91      | 92      | 89        | 89      | 94        | 91     | 88       |
| 2015 | Spring             | -        | 92     | 108      | 106      | 103     | 109     | 105     | 108       | 106     | 99        | 106    | 100      |
| 2015 | Summer             | 104      | 81     | 81       | 82       | 81      | 82      | 81      | 82        | 81      | 82        | 82     | 81       |
| 2015 | Autumn             | 76       | 97     | 97       | 97       | 102     | 97      | 97      | 97        | 98      | 97        | 101    | 97       |
| 2015 | Winter             | -        | 92     | 94       | 86       | 91      | 85      | 92      | 90        | 87      | 90        | 86     | 93       |
| 2016 | Spring             | 90       | 90     | 87       | 84       | 83      | 84      | 84      | 84        | 86      | 87        | -      | 88       |
| 2016 | Summer             | 88       | 85     | 85       | 87       | 87      | 87      | 83      | 91        | 83      | 86        | 86     | 90       |
| 2016 | Autumn             | 90       | 101    | -        | 99       | 99      | 100     | 101     | 106       | 100     | 103       | 99     | 96       |
| 2016 | Winter             | 85       | 97     | 99       | 91       | 96      | 90      | 93      | 95        | 93      | 93        | 91     | 97       |
| 2017 | Spring             | 102      | 82     | 81       | 94       | 82      | 97      | 89      | -         | 92      | 87        | 87     | 82       |
| 2017 | Summer             | 68       | 93     | 89       | 87       | 88      | 85      | 87      | 91        | 85      | 84        | 94     | 93       |
| 2017 | Autumn             | 120      | 89     | 94       | 95       | 94      | 97      | 95      | 105       | 97      | 98        | 98     | 89       |
| 2017 | Winter             | 84       | 97     | 97       | 92       | 93      | 92      | 93      | 89        | 95      | 95        | 88     | 97       |
| 2018 | Spring             | 92       | 79     | 79       | 82       | 79      | 82      | 81      | 83        | 78      | 79        | 83     | 79       |
| 2018 | Summer             | -        | 101    | 100      | 93       | 103     | 94      | 100     | 93        | 96      | 98        | 91     | 100      |
| 2018 | Autumn             | 92       | 96     | 98       | 101      | 94      | 99      | 89      | 101       | 102     | 95        | 101    | 98       |
| 2018 | Winter             | -        | 84     | 83       | 80       | -       | 81      | 91      | 81        | 81      | 88        | 81     | 83       |
| 2019 | Spring             | -        | 89     | 88       | 91       | 88      | 92      | 88      | 91        | 88      | 88        | 92     | 88       |
|      | Numbers of sampler | 13       | 20     | 19       | 20       | 19      | 19      | 20      | 19        | 20      | 20        | 19     | 20       |

-:Missing sample.

**Table S2.** The ring numbers, method detection limits (MDLs), TEF<sub>i</sub>, and other information for PAHs in this study

| The target compounds (abbreviation) | Ring Numbers | MDLs (ng sample <sup>-1</sup> ) | TEF <sub>i</sub> <sup>a</sup> | Standard curve   | Correlations |
|-------------------------------------|--------------|---------------------------------|-------------------------------|------------------|--------------|
| Acenaphthylene(Acy)                 | 3            | 0.13                            | 0.001                         | y=6326.2x+16600  | 0.9930       |
| Acenaphthene (Ace)                  | 3            | 0.10                            | 0.001                         | y=4837.4x+31320  | 0.9999       |
| Fluorene (Flu)                      | 3            | 0.09                            | 0.001                         | y=24634x+44631   | 0.9998       |
| Phenanthrene (Phe)                  | 3            | 0.08                            | 0.001                         | y=97525x+43017   | 0.9913       |
| Anthracene (Ant)                    | 3            | 0.04                            | 0.01                          | y=96301x+5130.4  | 0.9958       |
| Fluoranthene (Fla)                  | 4            | 0.02                            | 0.001                         | y=210183x-79803  | 0.9977       |
| Pyrene (Pyr)                        | 4            | 0.03                            | 0.001                         | y=209836x-75917  | 0.9979       |
| Benzo[a]anthracene (BaA)            | 4            | 0.03                            | 0.1                           | y=238735x-141456 | 0.9948       |
| Chrysene (Chr)                      | 4            | 0.04                            | 0.01                          | y=159007x-74207  | 0.9928       |
| Benzo[b]fluoranthene (BbF)          | 5            | 0.06                            | 0.1                           | y=283344x-180199 | 0.9982       |
| Benzo[k]fluoranthene (BkF)          | 5            | 0.06                            | 0.1                           | y=254895x-111330 | 0.9961       |
| Benzo[a]pyrene (BaP)                | 5            | 0.02                            | 1                             | y=233835x-119274 | 0.9986       |
| Dibenzo[a,h]anthracene (DahA)       | 5            | 0.05                            | 1                             | y=126081x-124963 | 0.9962       |
| Indeno[1,2,3-cd]pyrene (InD)        | 6            | 0.03                            | 0.1                           | y=240503x-180428 | 0.9961       |
| Benzo[ghi] perylene (BghiP)         | 6            | 0.07                            | 0.01                          | y=253793x-174580 | 0.9990       |

<sup>a</sup>: The toxic equivalency factors (TEFs) (Nisbet and Lagoy, 1992).x is the concentration of PAH, loaded on the gas sample which detected; y is the peak area of target compound. No target of PAHs was detected in laboratory blanks. Acy, Ace, Flu, Phe, Fla, and Pyr were detected in field blanks, and the values of Acy, Ace, Flu, Phe, Fla, and Pyr were 0.04 - 0.10, 0.04 - 0.09, 0.03 - 0.08, 0.01 - 0.04, ND (Not detected) - 0.01, and ND (Not detected) - 0.02.

**Table S3.** The annual concentration of PAHs around Bohai Sea (Mean±SD, ng m<sup>-3</sup>)

| Compound             | Summer 2014<br>to Spring 2015 | Summer 2015<br>to Spring 2016 | Summer 2016<br>to Spring 2017 | Summer 2017<br>to Spring 2018 | Summer 2018<br>to Spring 2019 | Five-year  |
|----------------------|-------------------------------|-------------------------------|-------------------------------|-------------------------------|-------------------------------|------------|
| Acy                  | 0.63±0.26                     | 0.86±0.56                     | 0.73±0.37                     | 1.07±0.72                     | 1.14±0.86                     | 0.89±0.22  |
| Ace                  | 0.54±0.07                     | 0.84±0.28                     | 1.33±0.66                     | 1.45±1.06                     | 1.52±0.87                     | 1.13±0.42  |
| Flu                  | 4.18±3.00                     | 6.51±6.30                     | 6.60±3.98                     | 8.63±7.50                     | 9.40±6.88                     | 6.97±1.92  |
| Phe                  | 25.64±18.09                   | 26.15±16.14                   | 24.21±17.52                   | 18.05±6.64                    | 14.85±9.2                     | 21.57±5.8  |
| Ant                  | 2.44±1.95                     | 2.48±2.12                     | 2.19±1.29                     | 2.91±2.08                     | 3.43±2.11                     | 2.67±0.46  |
| Fla                  | 11.84±5.60                    | 8.08±4.88                     | 13.26±4.89                    | 10.86±6.63                    | 12.35±6.6                     | 11.24±2.05 |
| Pyr                  | 7.60±3.47                     | 1.47±0.73                     | 8.49±2.97                     | 6.37±3.82                     | 7.47±3.83                     | 6.26±2.8   |
| BaA                  | 1.16±0.55                     | 1.29±0.30                     | 0.75±0.38                     | 0.66±0.55                     | 0.78±0.60                     | 0.92±0.29  |
| Chr                  | 1.65±0.44                     | 1.37±0.27                     | 1.39±0.49                     | 1.12±0.64                     | 1.20±0.62                     | 1.35±0.22  |
| BbF                  | 1.83±0.44                     | 1.46±0.20                     | 0.46±0.27                     | 0.26±0.26                     | 0.47±0.33                     | 0.89±0.71  |
| BkF                  | 1.15±0.20                     | 0.78±0.09                     | 0.29±0.11                     | 0.29±0.25                     | 0.55±0.35                     | 0.61±0.36  |
| BaP                  | 0.86±0.17                     | 1.14±0.43                     | 0.34±0.28                     | 0.32±0.16                     | 0.18±0.18                     | 0.57±0.42  |
| DahA                 | 1.03±0.42                     | 0.74±0.42                     | 0.07±0.04                     | 0.06±0.05                     | 0.04±0.02                     | 0.39±0.47  |
| InD                  | 1.22±0.57                     | 1.74±0.75                     | 0.32±0.18                     | 0.24±0.26                     | 0.21±0.14                     | 0.74±0.69  |
| BghiP                | 1.07±0.67                     | 1.10±0.20                     | 0.27±0.17                     | 0.20±0.20                     | 0.26±0.18                     | 0.58±0.46  |
| ∑ <sub>15</sub> PAHs | 63.55±58.43                   | 55.50±37.94                   | 60.90±31.13                   | 51.39±29.41                   | 52.50±40.08                   | 56.78±4.75 |
| LMW-PAHs             | 34.03±18.84                   | 36.42±29.83                   | 35.13±22.41                   | 31.60±24.08                   | 29.02±28.51                   | 33.23±6.81 |
| MMW-PAHs             | 22.54±18.51                   | 12.08±9.82                    | 24.04±19.86                   | 18.63±11.63                   | 21.60±11.42                   | 19.77±4.70 |
| HMW-PAHs             | 7.18±3.32                     | 6.93±3.28                     | 1.76±1.80                     | 1.19±2.12                     | 1.81±2.15                     | 3.78±2.69  |

**Table S4.** Significance level between annual mean concentration of PAHs by t-test

|                    | year 1-<br>year 2 | year 2-<br>year 3 | year 3-<br>year 4 | year 4-<br>year 5 |
|--------------------|-------------------|-------------------|-------------------|-------------------|
| $\Sigma_{15}$ PAHs | 0.541             | 0.477             | 0.139             | 0.142             |
| 3-ring             | 0.809             | 0.768             | 0.168             | 0.067             |
| 4-ring             | <b>0.002</b>      | <b>0.001</b>      | 0.152             | 0.575             |
| 5-ring             | 0.055             | <b>0.000</b>      | 0.108             | 0.056             |
| 6-ring             | 0.133             | <b>0.000</b>      | 0.219             | 0.813             |

Note: Bold:  $p < 0.05$ , the difference is significant.

**Table S5.** The seasonal concentration of PAHs (Mean $\pm$ SD, ng m<sup>-3</sup>)

| Compound           | Spring            | Summer            | Autumn           | Winter            |
|--------------------|-------------------|-------------------|------------------|-------------------|
| Acy                | 0.48 $\pm$ 0.19   | 0.42 $\pm$ 0.2    | 1.75 $\pm$ 0.56  | 0.89 $\pm$ 0.4    |
| Ace                | 0.72 $\pm$ 0.25   | 0.88 $\pm$ 0.84   | 1.31 $\pm$ 0.60  | 1.63 $\pm$ 1.15   |
| Flu                | 2.95 $\pm$ 1.71   | 1.95 $\pm$ 1.06   | 7.60 $\pm$ 2.23  | 15.81 $\pm$ 5.19  |
| Phe                | 18.83 $\pm$ 12.01 | 9.26 $\pm$ 4.61   | 17.22 $\pm$ 5.83 | 41.39 $\pm$ 14.32 |
| Ant                | 1.28 $\pm$ 0.76   | 0.65 $\pm$ 0.14   | 3.41 $\pm$ 0.64  | 5.43 $\pm$ 0.95   |
| Fla                | 9.08 $\pm$ 5.54   | 5.84 $\pm$ 4.52   | 11.03 $\pm$ 1.57 | 19.17 $\pm$ 2.68  |
| Pyr                | 4.94 $\pm$ 3.37   | 3.77 $\pm$ 3.75   | 6.14 $\pm$ 2.64  | 10.34 $\pm$ 4.38  |
| BaA                | 0.61 $\pm$ 0.34   | 0.50 $\pm$ 0.37   | 0.91 $\pm$ 0.31  | 1.69 $\pm$ 0.24   |
| Chr                | 1.27 $\pm$ 0.38   | 0.84 $\pm$ 0.42   | 1.23 $\pm$ 0.31  | 2.05 $\pm$ 0.27   |
| BbF                | 0.81 $\pm$ 0.74   | 0.61 $\pm$ 0.63   | 0.80 $\pm$ 0.75  | 1.37 $\pm$ 0.74   |
| BkF                | 0.64 $\pm$ 0.44   | 0.42 $\pm$ 0.38   | 0.51 $\pm$ 0.39  | 0.88 $\pm$ 0.37   |
| BaP                | 0.42 $\pm$ 0.30   | 0.31 $\pm$ 0.33   | 0.63 $\pm$ 0.58  | 0.91 $\pm$ 0.48   |
| DahA               | 0.40 $\pm$ 0.53   | 0.13 $\pm$ 0.16   | 0.38 $\pm$ 0.47  | 0.64 $\pm$ 0.73   |
| InD                | 0.74 $\pm$ 0.83   | 0.38 $\pm$ 0.35   | 0.62 $\pm$ 0.79  | 1.24 $\pm$ 1.00   |
| BghiP              | 0.72 $\pm$ 0.82   | 0.32 $\pm$ 0.34   | 0.40 $\pm$ 0.42  | 0.88 $\pm$ 0.47   |
| $\Sigma_{15}$ PAHs | 43.89 $\pm$ 19.54 | 26.28 $\pm$ 13.42 | 53.94 $\pm$ 9.10 | 104.32 $\pm$ 9.50 |
| LMW-PAHs           | 24.26 $\pm$ 14.71 | 13.16 $\pm$ 6.62  | 31.29 $\pm$ 8.03 | 65.15 $\pm$ 12.10 |
| MMW-PAHs           | 15.90 $\pm$ 8.93  | 10.95 $\pm$ 8.48  | 19.31 $\pm$ 3.93 | 33.30 $\pm$ 7.10  |
| HMW-PAHs           | 3.73 $\pm$ 3.53   | 2.17 $\pm$ 2.14   | 3.34 $\pm$ 3.10  | 5.93 $\pm$ 3.51   |



**Table S6.** Significant difference between seasonal PAHs concentration and ring number by t-test

| Compound           | Spring-Summer | Summer-Autumn | Autumn-Winter | Winter-Spring |
|--------------------|---------------|---------------|---------------|---------------|
| $\Sigma_{15}$ PAHs | <b>0.000</b>  | <b>0.000</b>  | <b>0.000</b>  | <b>0.000</b>  |
| 3-ring             | <b>0.000</b>  | <b>0.000</b>  | <b>0.000</b>  | <b>0.000</b>  |
| 4-ring             | <b>0.035</b>  | <b>0.003</b>  | <b>0.000</b>  | <b>0.000</b>  |
| 5-ring             | <b>0.005</b>  | <b>0.007</b>  | <b>0.001</b>  | <b>0.001</b>  |
| 6-ring             | <b>0.001</b>  | 0.123         | <b>0.000</b>  | <b>0.045</b>  |

**Table S7.** The annual average daily concentration of 15 PAHs at 12 sampling sites from June 2014 to May 2019 (Mean±SD, ng m<sup>-3</sup>)

| Compounds            | BH          | DL         | DG         | DY         | GZ          | LK         | LT          | RC         | TJ          | XC           | YT         | ZH          |
|----------------------|-------------|------------|------------|------------|-------------|------------|-------------|------------|-------------|--------------|------------|-------------|
| Acy                  | 0.61±0.20   | 0.61±0.20  | 0.83±0.37  | 0.47±0.08  | 1.39±0.52   | 0.35±0.24  | 1.28±0.47   | 0.46±0.07  | 0.76±0.20   | 2.22±0.78    | 0.46±0.08  | 1.18±0.58   |
| Ace                  | 0.82±0.24   | 0.82±0.24  | 1.45±0.79  | 0.65±0.18  | 1.60±0.65   | 0.69±0.45  | 1.34±0.52   | 0.86±0.25  | 1.42±0.66   | 1.64±0.59    | 0.75±0.24  | 1.28±0.57   |
| Flu                  | 3.95±0.61   | 3.95±0.61  | 8.10±3.57  | 4.05±0.80  | 9.80±2.32   | 4.81±1.22  | 10.08±3.15  | 3.25±1.03  | 5.85±1.20   | 15.51±5.59   | 3.73±1.44  | 9.31±4.42   |
| Phe                  | 14.25±2.36  | 14.30±2.36 | 27.05±8.31 | 11.38±2.28 | 45.20±15.92 | 14.81±4.18 | 40.56±10.41 | 9.96±4.05  | 23.26±6.57  | 32.65±27.4   | 13.79±3.85 | 37.86±12.78 |
| Ant                  | 1.07±0.30   | 1.07±0.30  | 2.83±1.44  | 0.73±0.23  | 5.72±1.99   | 1.05±0.35  | 3.69±0.95   | 0.90±0.34  | 1.24±0.22   | 8.30±3.84    | 0.91±0.28  | 3.98±1.76   |
| Fla                  | 5.30±1.43   | 5.30±1.43  | 12.51±3.55 | 5.65±1.17  | 22.26±6.69  | 7.11±2.72  | 16.76±4.13  | 4.67±1.70  | 11.07±4.47  | 20.90±4.31   | 7.23±1.78  | 13.58±4.56  |
| Pyr                  | 2.78±1.38   | 2.78±1.38  | 6.91±3.17  | 2.28±0.86  | 13.51±6.45  | 3.77±2.22  | 9.43±4.09   | 2.40±1.07  | 5.64±3.81   | 12.10±5.26   | 3.33±1.00  | 8.80±4.14   |
| BaA                  | 0.54±0.40   | 0.54±0.40  | 0.97±0.32  | 0.52±0.34  | 1.59±0.48   | 0.46±0.10  | 1.15±0.27   | 0.47±0.31  | 0.79±0.46   | 2.09±0.60    | 0.58±0.37  | 1.19±0.27   |
| Chr                  | 0.84±0.44   | 0.84±0.44  | 1.25±0.47  | 0.99±0.22  | 2.30±0.60   | 0.95±0.38  | 1.68±0.23   | 0.83±0.25  | 1.43±0.72   | 2.21±0.44    | 1.05±0.29  | 1.45±0.32   |
| BbF                  | 0.70±0.69   | 0.70±0.69  | 0.86±0.54  | 0.73±0.63  | 1.25±0.63   | 0.68±0.48  | 0.98±0.67   | 0.65±0.60  | 0.86±0.72   | 1.33±0.79    | 0.74±0.65  | 1.07±0.79   |
| BkF                  | 0.46±0.42   | 0.46±0.42  | 0.65±0.29  | 0.50±0.36  | 0.83±0.24   | 0.44±0.25  | 0.69±0.33   | 0.43±0.35  | 0.57±0.38   | 0.99±0.50    | 0.52±0.35  | 0.70±0.47   |
| BaP                  | 0.32±0.27   | 0.32±0.27  | 0.45±0.21  | 0.34±0.26  | 0.90±0.53   | 0.44±0.37  | 0.88±0.60   | 0.21±0.30  | 0.72±0.62   | 0.91±0.49    | 0.59±0.57  | 0.61±0.40   |
| DahA                 | 0.17±0.19   | 0.17±0.19  | 0.34±0.35  | 0.25±0.28  | 0.54±0.54   | 0.54±0.69  | 0.56±0.64   | 0.17±0.15  | 0.57±0.69   | 0.62±0.64    | 0.36±0.49  | 0.28±0.34   |
| InD                  | 0.59±0.60   | 0.59±0.60  | 0.72±0.49  | 0.55±0.52  | 1.04±0.77   | 0.38±0.25  | 1.04±0.91   | 0.36±0.36  | 0.91±0.89   | 1.35±1.21    | 0.69±0.72  | 0.69±0.53   |
| BghiP                | 0.42±0.42   | 0.42±0.42  | 0.48±0.29  | 0.58±0.56  | 0.76±0.43   | 0.52±0.41  | 0.66±0.43   | 0.31±0.27  | 0.66±0.58   | 0.89±0.51    | 0.57±0.54  | 0.54±0.37   |
| ∑ <sub>15</sub> PAHs | 27.54±10.89 | 32.87±7.03 | 65.40±9.68 | 29.67±3.68 | 98.80±27.81 | 37.00±9.60 | 90.78±17.12 | 25.92±6.41 | 55.75±16.92 | 103.71±39.11 | 35.30±7.58 | 72.52±25.42 |
| LMW-PAHs             | 16.94±6.94  | 20.75±2.54 | 40.26±7.47 | 17.28±3.32 | 53.71±16.01 | 21.71±5.97 | 56.95±11.73 | 15.43±5.25 | 32.53±7.17  | 60.32±34.68  | 19.64±5.44 | 43.61±18.91 |
| MMW-PAHs             | 8.81±5.10   | 9.46±3.14  | 21.64±6.91 | 9.44±1.83  | 39.66±13.86 | 12.29±5.24 | 29.02±7.90  | 8.37±2.66  | 18.93±8.83  | 37.30±9.57   | 12.19±2.28 | 25.02±8.89  |
| HMW-PAHs             | 1.89±1.45   | 2.68±2.52  | 3.52±2.05  | 3.00±2.51  | 5.43±2.89   | 3.06±2.32  | 4.90±3.35   | 2.18±1.72  | 4.35±3.72   | 6.27±3.65    | 3.52±3.03  | 3.97±2.68   |

**Table S8.** Pearson correlation coefficients of the proportion of different ring number of PAHs among 12 sampling sites from June 2014 to May 2019

|    | BH    | DL    | DG    | DY    | GZ    | LT    | LK    | RC    | TJ    | XC    | YT    | ZH |
|----|-------|-------|-------|-------|-------|-------|-------|-------|-------|-------|-------|----|
| BH | 1     |       |       |       |       |       |       |       |       |       |       |    |
| DL | .99** | 1     |       |       |       |       |       |       |       |       |       |    |
| DG | .99** | .99** | 1     |       |       |       |       |       |       |       |       |    |
| DY | .99** | .99** | .99** | 1     |       |       |       |       |       |       |       |    |
| GZ | .98** | .98** | .99** | .98** | 1     |       |       |       |       |       |       |    |
| LT | .98** | .99** | .99** | .99** | .99** | 1     |       |       |       |       |       |    |
| LK | .99** | .99** | .99** | .99** | .99** | .99** | 1     |       |       |       |       |    |
| RC | .99** | .99** | .99** | .99** | .99** | .99** | .99** | 1     |       |       |       |    |
| TJ | .98** | .99** | .99** | .99** | .99** | .99** | .99** | .99** | 1     |       |       |    |
| XC | .97** | .99** | .99** | .98** | .98** | .99** | .98** | .98** | .98** | 1     |       |    |
| YT | .98** | .98** | .99** | .99** | .99** | .99** | .99** | .99** | .99** | .98** | 1     |    |
| ZH | .97** | .99** | .99** | .98** | .99** | .99** | .99** | .99** | .99** | .99** | .98** | 1  |

Note: \*\*. at the 0.05 level (two-tailed), the correlation is significant, \* at the 0.01 level (two-tailed), the correlation is significant.

**Table S9.** Pearson correlation coefficient of 20 seasonal concentrations of PAHs at Tianjin and the four adjacent sites

|    | TJ     | LT     | DY     | LK     | XC |
|----|--------|--------|--------|--------|----|
| TJ | 1      |        |        |        |    |
| LT | 0.50*  | 1      |        |        |    |
| DY | 0.61*  | 0.89** | 1      |        |    |
| LK | 0.66** | 0.73** | 0.75** | 1      |    |
| XC | 0.68** | 0.79** | 0.72** | 0.77** | 1  |

Note: \*\*. at the 0.01 level (two-tailed), the correlation is significant.

**Table S10.** VARIMAX-rotated factor loadings of PCA of atmospheric PAHs at the BS

| PAHs                       | PC1          | PC2          | PC3          | PC4          |
|----------------------------|--------------|--------------|--------------|--------------|
| Ace                        | -0.057       | <b>0.631</b> | 0.003        | <b>0.678</b> |
| Acy                        | 0.050        | 0.154        | 0.266        | <b>0.830</b> |
| Flu                        | 0.157        | 0.510        | 0.553        | 0.498        |
| Ant                        | 0.228        | 0.394        | <b>0.690</b> | 0.470        |
| Phe                        | 0.255        | 0.325        | <b>0.867</b> | 0.123        |
| BaA                        | 0.548        | 0.560        | 0.462        | 0.303        |
| Chr                        | 0.517        | <b>0.694</b> | 0.324        | 0.214        |
| Fla                        | 0.217        | <b>0.819</b> | 0.400        | 0.241        |
| Pyr                        | 0.047        | <b>0.930</b> | 0.219        | 0.141        |
| BaP                        | <b>0.826</b> | 0.048        | 0.343        | 0.110        |
| BkF                        | <b>0.827</b> | 0.474        | 0.095        | 0.094        |
| DahA                       | <b>0.859</b> | -0.009       | 0.033        | -0.110       |
| InD                        | <b>0.886</b> | -0.042       | 0.302        | 0.202        |
| BbF                        | <b>0.909</b> | 0.297        | 0.200        | 0.005        |
| BghiP                      | <b>0.932</b> | 0.168        | -0.006       | 0.038        |
| Explained variance (%)     | 35.657       | 24.130       | 15.925       | 12.828       |
| Sum explained variance (%) | 35.657       | 59.787       | 75.712       | 88.540       |

Note: The bold value indicates that the PCA load is greater than 0.6.

**Table S11.** Characteristic PAH molecular diagnostic ratios

|                 | Petrogenic | Petroleum combustion | Grass, wood, coal combustion | Reference                                      |
|-----------------|------------|----------------------|------------------------------|------------------------------------------------|
| Fla/(Fla+Pyr)   | <0.4       | 0.4–0.5              | >0.5                         | (Westerholm et al., 2001; Yunker et al., 2002; |
| InD/(InD+Bghip) | <0.2       | 0.2–0.5              | >0.5                         | Tobiszewski and Namiesnik, 2012)               |

**Table S12.** The seasonal mean concentration of PM<sub>2.5</sub> (μg m<sup>-3</sup>) and PAHs (ng m<sup>-3</sup>)

| sites       | DG                |      | DL                |      | DY                |      | GZ                |      | LT                |      | TJ                |      | XC                |      | YT                |      |
|-------------|-------------------|------|-------------------|------|-------------------|------|-------------------|------|-------------------|------|-------------------|------|-------------------|------|-------------------|------|
|             | PM <sub>2.5</sub> | PAHs |
| 2014 summer | 35                | 25   | 43                | 8    | 60                | 16   | 30                | 45   | 77                | 35   | 64                | 55   | 48                | 49   | 44                | 16   |
| 2014 autumn | 44                | 56   | 49                | 29   | 73                | 26   | 37                | 172  | 96                | 82   | 89                | 74   | 45                | 123  | 42                | 31   |
| 2014 winter | 61                | 117  | 54                | 70   | 87                | 70   | 53                | 288  | 102               | 178  | 96                | 103  | 65                | 191  | 55                | 74   |
| 2015 spring | 47                | 43   | 44                | 20   | 73                | 17   | 47                | 78   | 90                | 53   | 62                | 42   | 55                | 52   | 47                | 21   |
| 2015 summer | 29                | 18   | 31                | 12   | 59                | 10   | 28                | 31   | 63                | 31   | 53                | 33   | 45                | 25   | 32                | 19   |
| 2015 autumn | 47                | 69   | 50                | 26   | 76                | 25   | 54                | 79   | 71                | 97   | 62                | 88   | 42                | 215  | 36                | 43   |
| 2015 winter | 56                | 88   | 58                | 84   | 104               | 45   | 63                | 126  | 91                | 153  | 83                | 117  | 60                | 396  | 59                | 66   |
| 2016 spring | 50                | 22   | 44                | 14   | 64                | 21   | 42                | 41   | 65                | 30   | 65                | 73   | 46                | 35   | 44                | --   |
| 2016 summer | 28                | 85   | 24                | 28   | 41                | 11   | 28                | 89   | 51                | 36   | 49                | 20   | 36                | 119  | 25                | 18   |
| 2016 autumn | 38                | --   | 36                | 24   | 65                | 30   | 49                | 167  | 82                | 65   | 73                | 46   | 46                | 91   | 36                | 34   |
| 2016 winter | 54                | 114  | 54                | 49   | 96                | 76   | 74                | 212  | 121               | 175  | 110               | 108  | 78                | 281  | 54                | 42   |
| 2017 spring | 42                | 13   | 38                | 32   | 54                | 19   | 38                | 59   | 60                | 69   | 58                | 41   | 43                | 53   | 37                | 18   |
| 2017 summer | 20                | 19   | 24                | 11   | 38                | 11   | 28                | 27   | 44                | 31   | 45                | 20   | 37                | 34   | 25                | 15   |
| 2017 autumn | 29                | 48   | 27                | 20   | 50                | 25   | 36                | 82   | 62                | 82   | 56                | 36   | 38                | 100  | 27                | 29   |
| 2017 winter | 44                | 194  | 38                | 71   | 67                | 45   | 62                | 119  | 67                | 142  | 61                | 65   | 58                | 148  | 41                | 46   |
| 2018 spring | 31                | 44   | 31                | 18   | 47                | 19   | 41                | 126  | 59                | 59   | 52                | 30   | 41                | 27   | 29                | 12   |
| 2018 summer | 16                | 14   | 19                | 8    | 27                | 8    | 20                | 33   | 41                | 21   | 36                | 14   | 25                | 10   | 19                | 11   |
| 2018 autumn | 26                | 36   | 28                | 11   | 45                | 28   | 39                | 172  | 58                | 115  | 51                | 35   | 40                | 280  | 24                | 22   |
| 2018 winter | 50                | 141  | 45                | 42   | 73                | 56   | 61                | --   | 73                | 186  | 71                | 62   | 62                | 325  | 57                | 71   |
| 2019 Spring | 38                | 91   | 40                | 31   | 45                | 33   | 41                | 122  | 51                | 174  | 48                | 21   | 45                | 116  | 35                | 74   |

The data of PM<sub>2.5</sub> from <https://www.aqistudy.cn/historydata/>;--: Missing sample

**Table S13.** The Pearson correlation of concentration between PM<sub>2.5</sub> and PAHs

| sites               | DG    | DL     | DY     | GZ     | LT    | TJ     | XC     | YT     |
|---------------------|-------|--------|--------|--------|-------|--------|--------|--------|
| Pearson correlation | .537* | .637** | .724** | .600** | .485* | .868** | .705** | .682** |
| Sig. (two- tailed)  | 0.018 | 0.003  | 0.000  | 0.007  | 0.030 | 0.000  | 0.001  | 0.001  |
| Number of cases     | 19    | 20     | 20     | 19     | 20    | 20     | 20     | 19     |

\*\* . At the 0.01 level (two-tailed), the correlation is significant.

**Table S14.** The annual mean of ILCR caused by PAHs exposure around the BS and TJ from June 2014 to May 2019

| Area | 2014-2015             | 2015-2016             | 2016-2017             | 2017-2018             | 2018-2019             | Average               |
|------|-----------------------|-----------------------|-----------------------|-----------------------|-----------------------|-----------------------|
| BS   | $2.22 \times 10^{-4}$ | $2.16 \times 10^{-4}$ | $5.86 \times 10^{-4}$ | $4.07 \times 10^{-5}$ | $5.70 \times 10^{-5}$ | $1.19 \times 10^{-4}$ |
| TJ   | $3.16 \times 10^{-4}$ | $2.94 \times 10^{-4}$ | $7.33 \times 10^{-5}$ | $2.39 \times 10^{-5}$ | $2.72 \times 10^{-5}$ | $1.47 \times 10^{-4}$ |

**Table S15.** Annual average TEQ of atmospheric PAHs around the BS from June 2014 to May 2019

| Year      | TEQ       | BaP       | DahA      | TEQ-BaP%  | TEQ-DahA% |
|-----------|-----------|-----------|-----------|-----------|-----------|
| 2014–2015 | 2.55±1.49 | 0.87±0.56 | 1.04±0.87 | 31.5±23.6 | 29.5±24.0 |
| 2015–2016 | 2.49±1.63 | 1.14±0.84 | 0.73±0.73 | 36.0±27.7 | 20.8±22.2 |
| 2016–2017 | 0.69±0.76 | 0.34±0.44 | 0.07±0.07 | 42.7±16.1 | 11.8±7.1  |
| 2017–2018 | 0.46±0.66 | 0.17±0.27 | 0.06±0.10 | 37.5±11.2 | 12.7±8.0  |
| 2018–2019 | 0.67±0.84 | 0.32±0.43 | 0.04±0.06 | 43.3±15.6 | 8.3±11.6  |
| Average   | 1.37±1.05 | 0.57±0.41 | 0.39±0.47 | 38.2±8.0  | 16.6±9.0  |

Note: TEQ-BaP% and TEQ-DahA% represent the proportion of BaP and DahA in TEQ, respectively.

**Table S16.** The direct medical costs of lung cancer caused by PAHs exposure around the BS

| Year    | rr     | URR  | PAF   | I <sub>add</sub>      | Population (persons) | C <sub>t</sub> (USD) |
|---------|--------|------|-------|-----------------------|----------------------|----------------------|
| 2014    | 1.0027 | 4.49 | 2.68‰ | 2.34×10 <sup>-6</sup> | 2.29×10 <sup>8</sup> | 4.35×10 <sup>6</sup> |
| 2015    | 1.0026 | 4.49 | 2.61‰ | 2.28×10 <sup>-6</sup> | 2.30×10 <sup>8</sup> | 4.27×10 <sup>6</sup> |
| 2016    | 1.0007 | 4.49 | 0.73‰ | 6.36×10 <sup>-7</sup> | 2.32×10 <sup>8</sup> | 1.20×10 <sup>6</sup> |
| 2017    | 1.0005 | 4.49 | 0.49‰ | 4.25×10 <sup>-7</sup> | 2.33×10 <sup>8</sup> | 8.03×10 <sup>5</sup> |
| 2018    | 1.0007 | 4.49 | 0.70‰ | 6.15×10 <sup>-7</sup> | 2.34×10 <sup>8</sup> | 1.17×10 <sup>5</sup> |
| Average | 1.0014 | 4.49 | 1.44‰ | 1.26×10 <sup>-6</sup> | 2.32×10 <sup>8</sup> | 3.36×10 <sup>6</sup> |

Note: The population data derives from: <http://tjj.ln.gov.cn/tjsj/sjcx/ndsj/>,  
<http://tjj.hebei.gov.cn/hetj/tjsj/jjnj/>,  
<http://tjj.shandong.gov.cn/col/col104011/index.html?jh=263>.

**Table S17.** The direct medical costs of lung cancer caused by PAHs exposure at TJ

| Year    | rr     | URR  | PAF   | I <sub>add</sub>      | Population (persons) | C <sub>t</sub> (USD) |
|---------|--------|------|-------|-----------------------|----------------------|----------------------|
| Year 1  | 1.0038 | 4.49 | 3.81‰ | 3.33×10 <sup>-6</sup> | 1.52×10 <sup>7</sup> | 4.39×10 <sup>5</sup> |
| Year 2  | 1.0036 | 4.49 | 3.54‰ | 3.10×10 <sup>-6</sup> | 1.55×10 <sup>7</sup> | 4.17×10 <sup>5</sup> |
| Year 3  | 1.0009 | 4.49 | 0.89‰ | 7.73×10 <sup>-7</sup> | 1.56×10 <sup>7</sup> | 1.05×10 <sup>5</sup> |
| Year 4  | 1.0003 | 4.49 | 0.29‰ | 2.53×10 <sup>-7</sup> | 1.56×10 <sup>7</sup> | 3.42×10 <sup>4</sup> |
| Year 5  | 1.0003 | 4.49 | 0.33‰ | 2.87×10 <sup>-7</sup> | 1.56×10 <sup>7</sup> | 3.90×10 <sup>4</sup> |
| Average | 1.0018 | 4.49 | 1.77‰ | 1.55×10 <sup>-6</sup> | 1.55×10 <sup>7</sup> | 2.07×10 <sup>5</sup> |

Note: The population data derives from: [http://stats.tj.gov.cn/tjsj\\_52032/tjnj/](http://stats.tj.gov.cn/tjsj_52032/tjnj/).



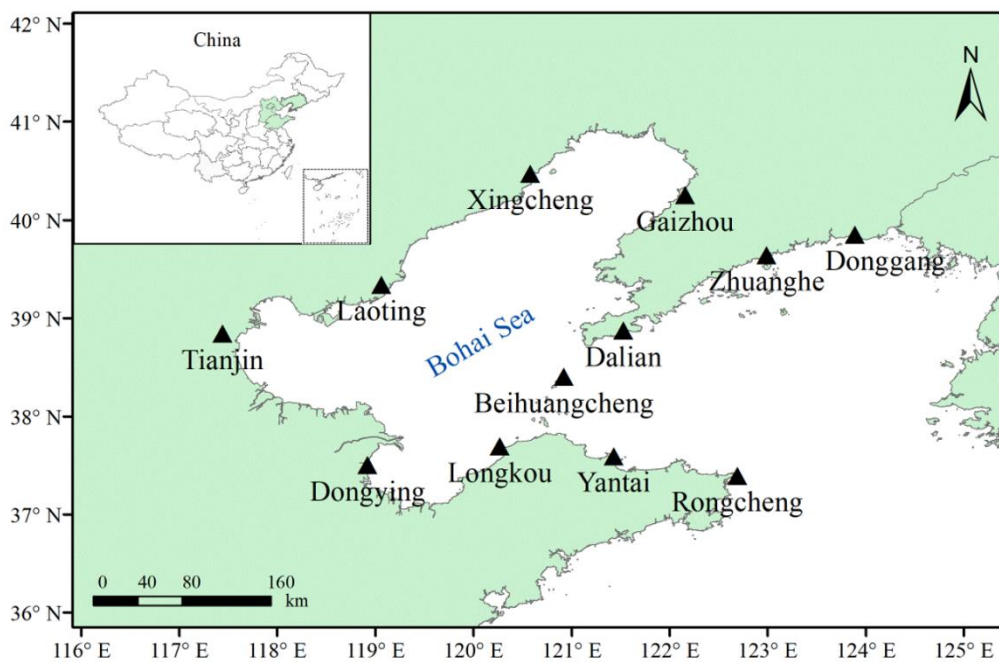

**Fig. S1.** The locations of the 12 sampling sites around the BS.

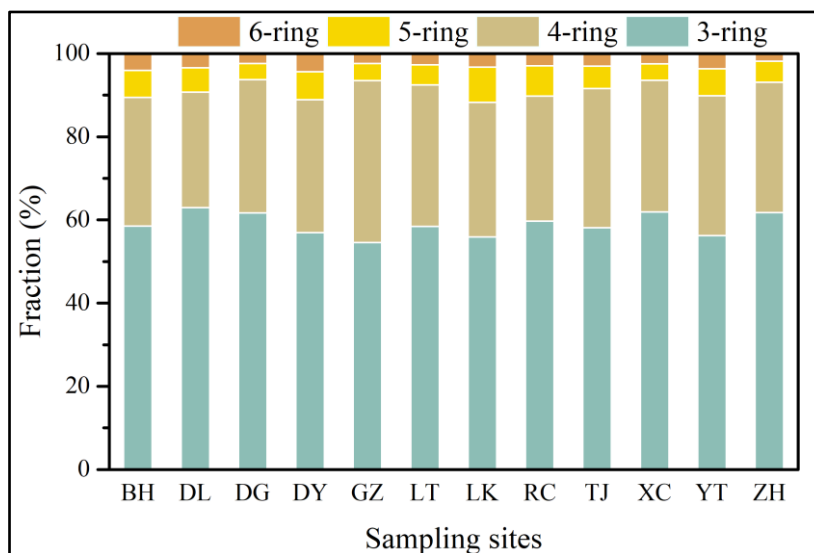

**Fig. S2.** The five-year average fractions of different rings of  $\sum_{15}$  PAHs at 12 sampling sites.

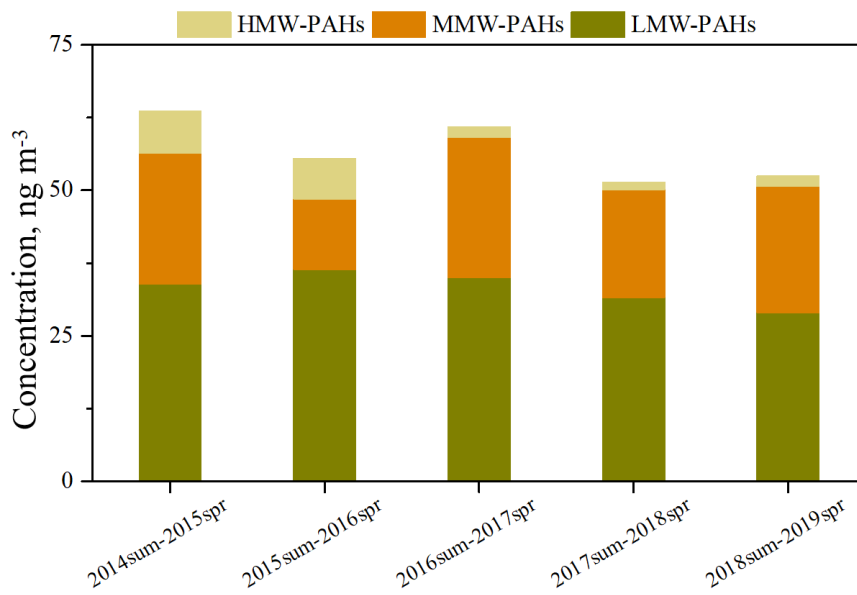

Fig. S3. The annual average concentration of PAHs sub-rings around the BS.

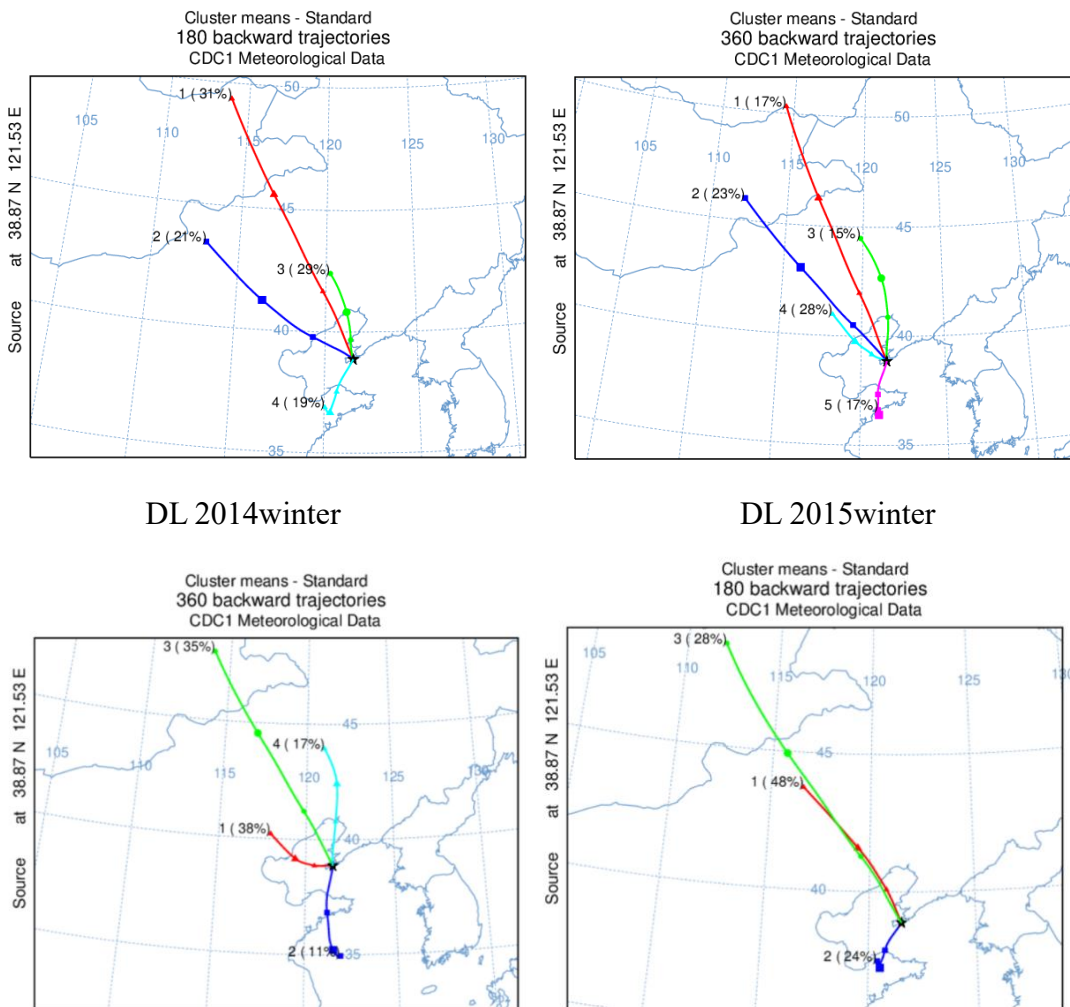

DL 2016winter

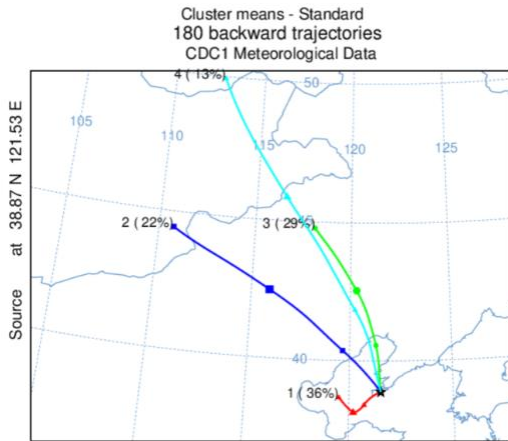

DL 2017winter

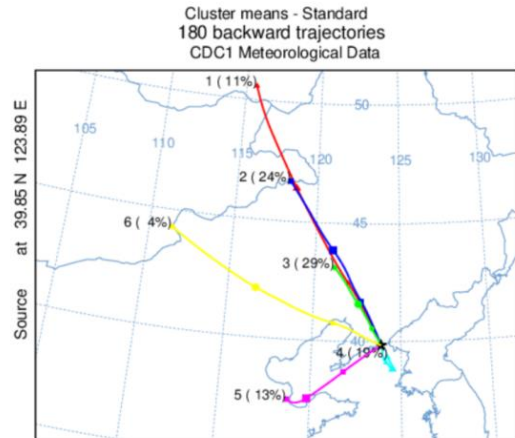

DL 2018winter

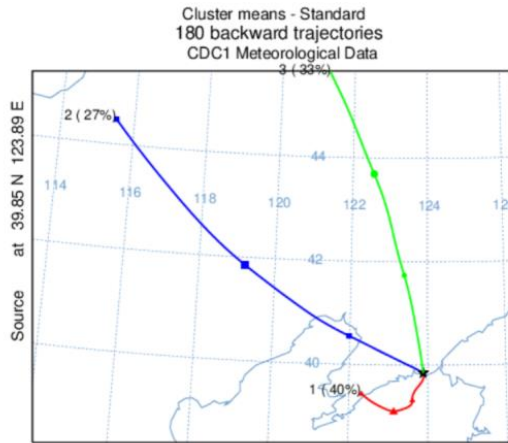

DG 2014winter

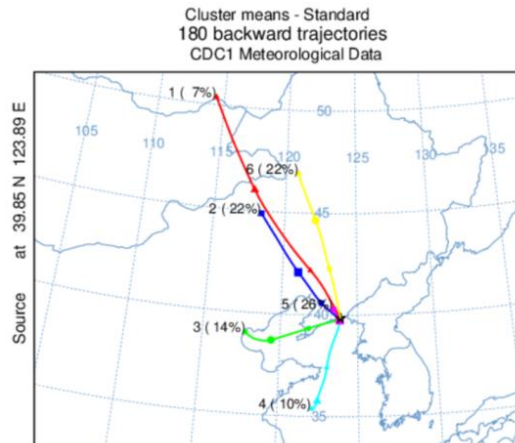

DG 2015winter

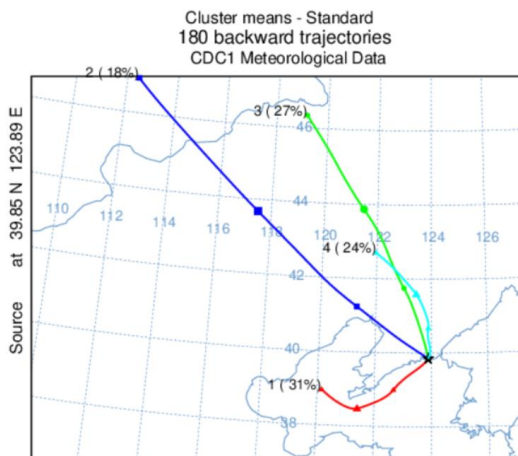

DG 2016winter

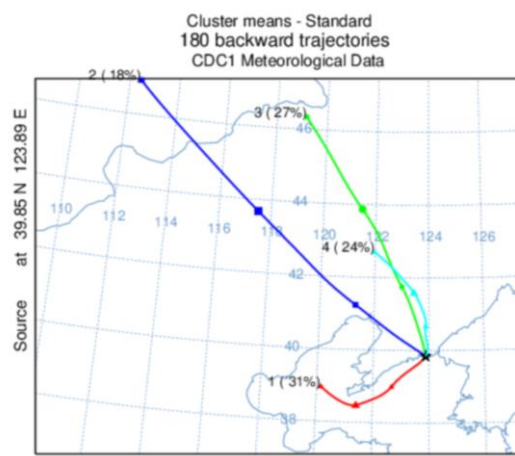

DG 2017winter

DG 2017winter

DG 2018winter

DG 2018winter

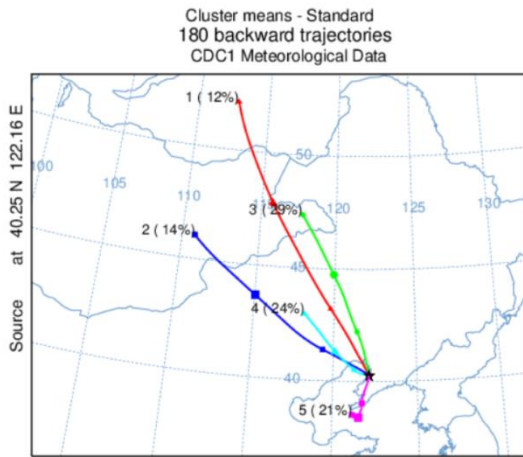

GZ 2014winter

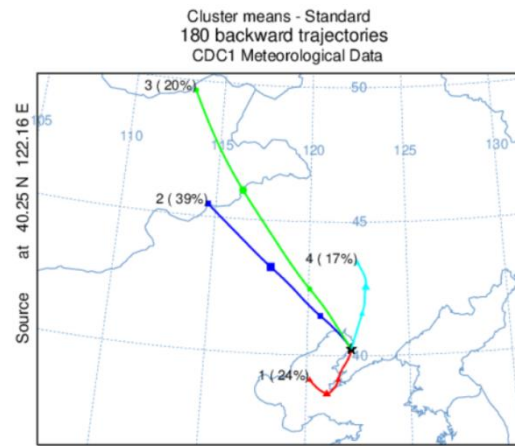

GZ 2015winter

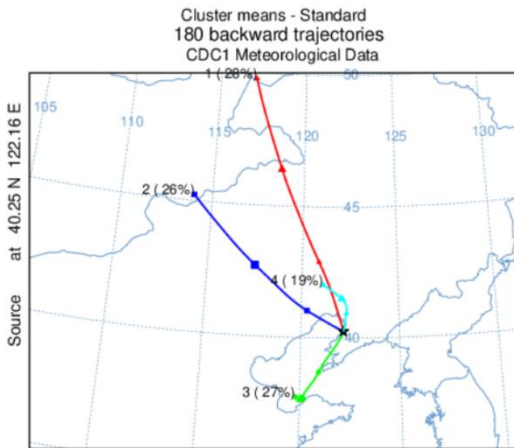

GZ 2016winter

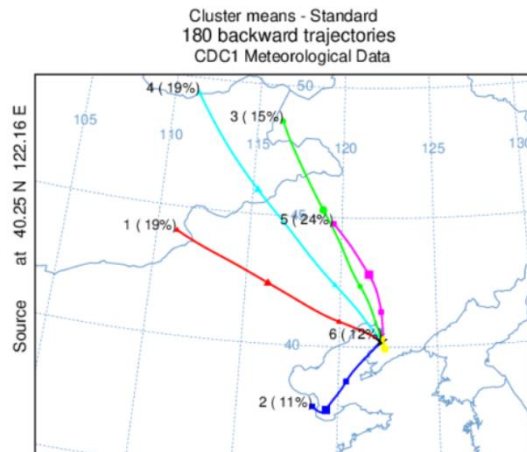

GZ 2017winter

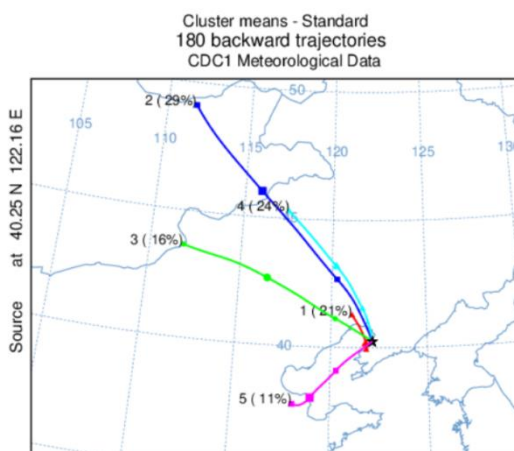

GZ 2018winter

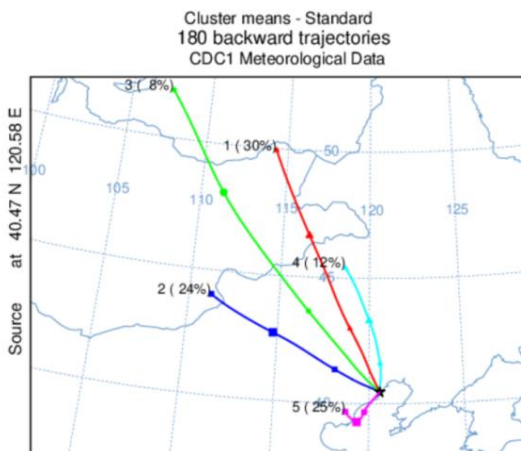

XC 2014winter

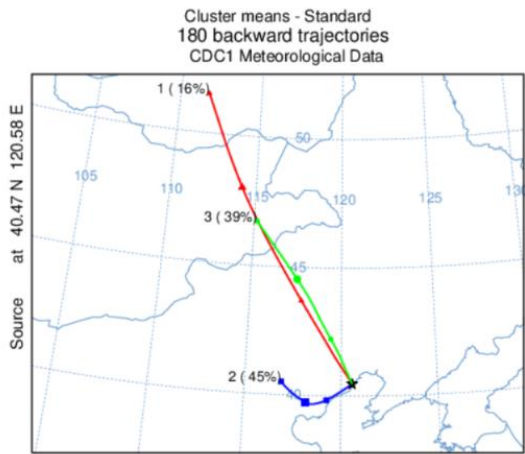

XC 2015winter

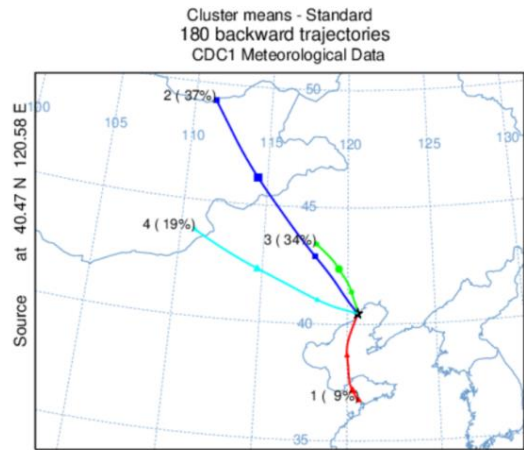

XC 2016winter

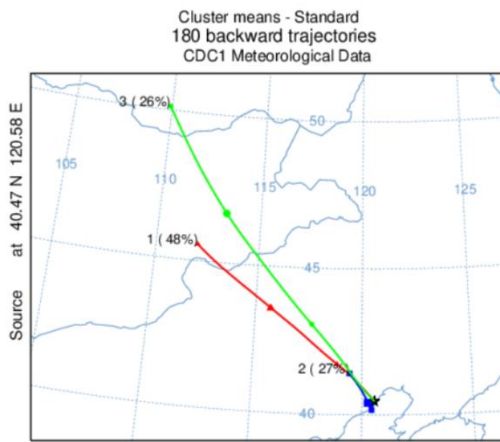

XC 2017winter

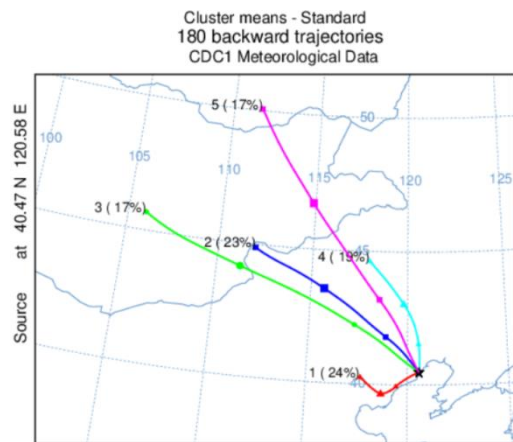

XC 2018winter

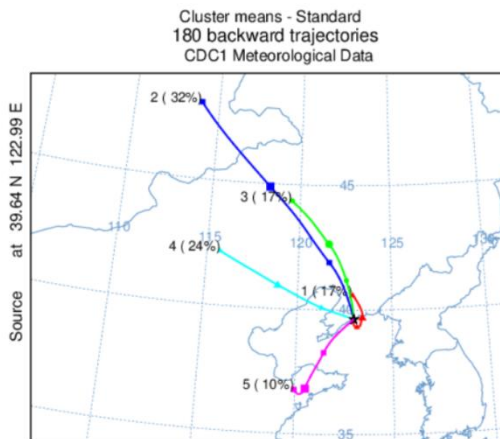

ZH 2014winter

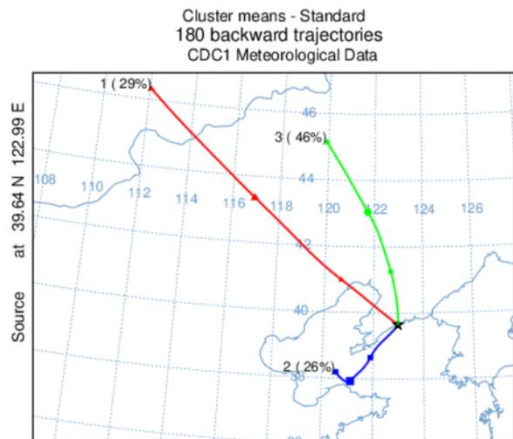

ZH 2015winter

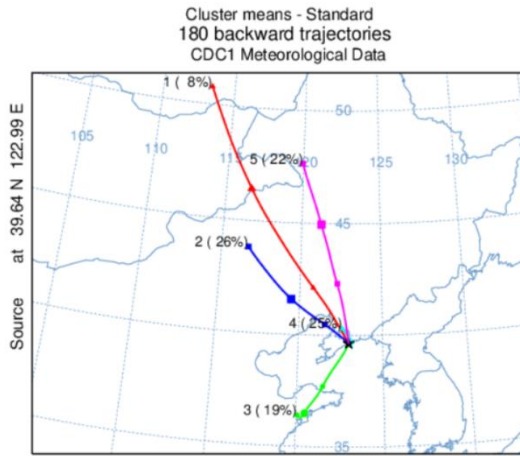

ZH 2016winter

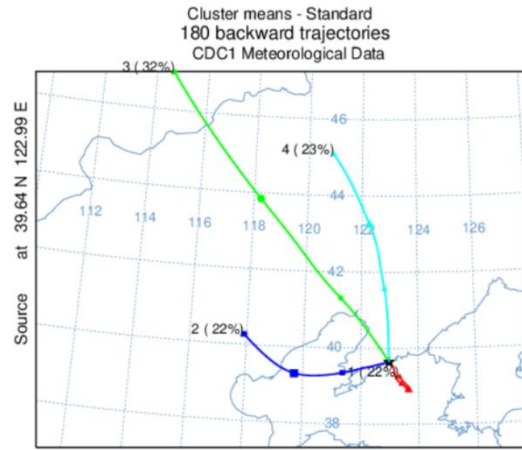

ZH 2017winter

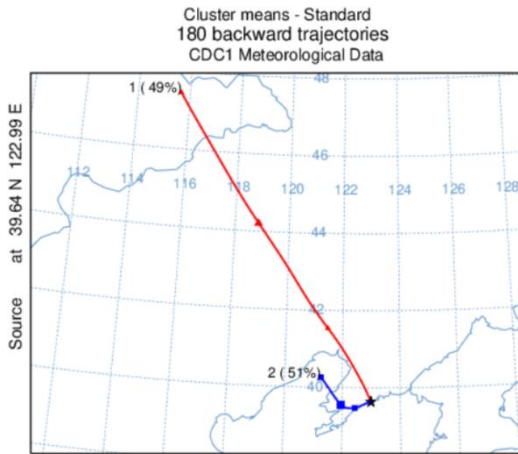

ZH 2018winter

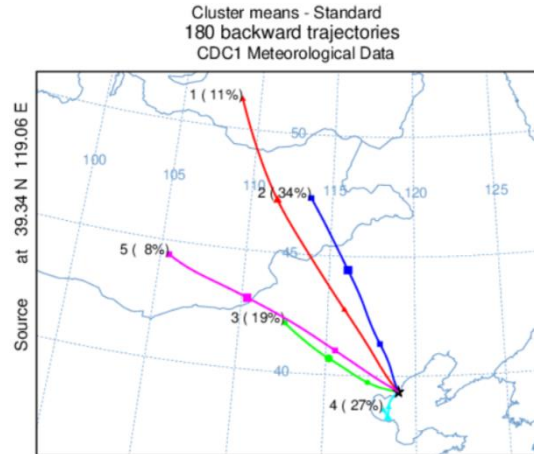

LT 2014winter

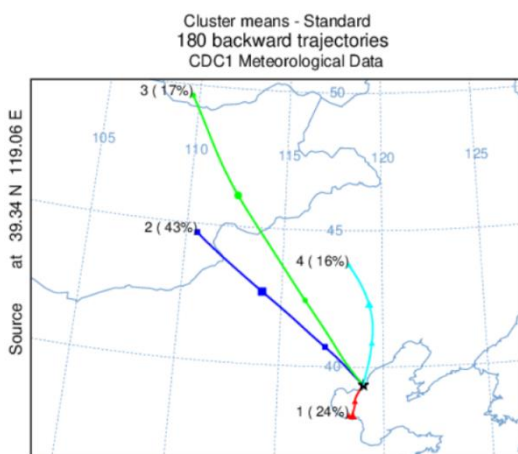

LT 2015winter

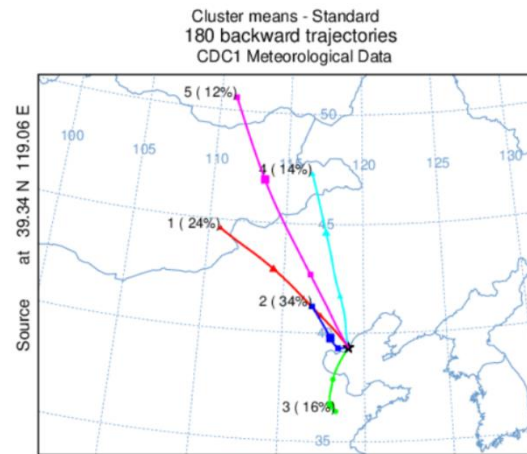

LT 2016winter

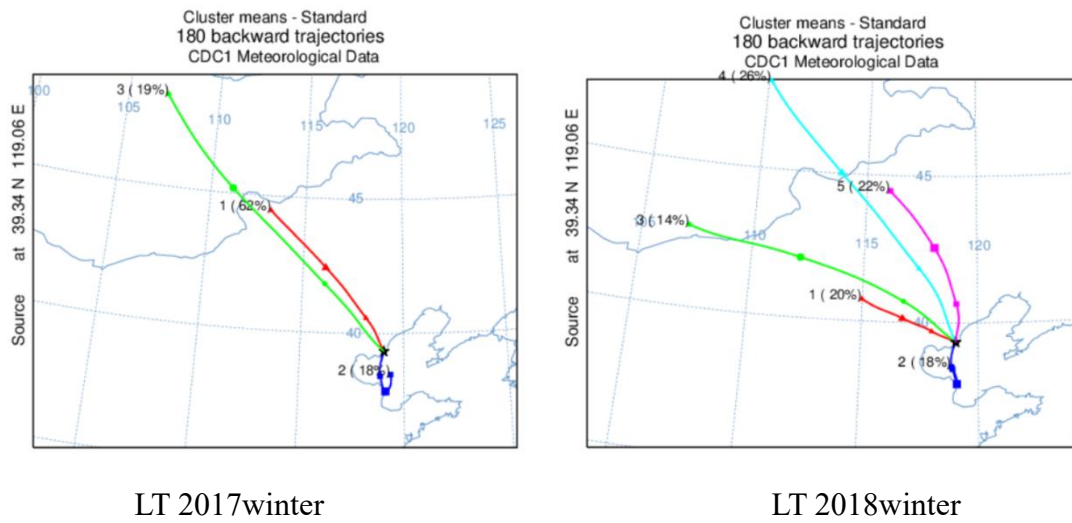

**Fig. S4.** The backward trajectory by Hysplit model of the northern Bohai Sea sites in winter.

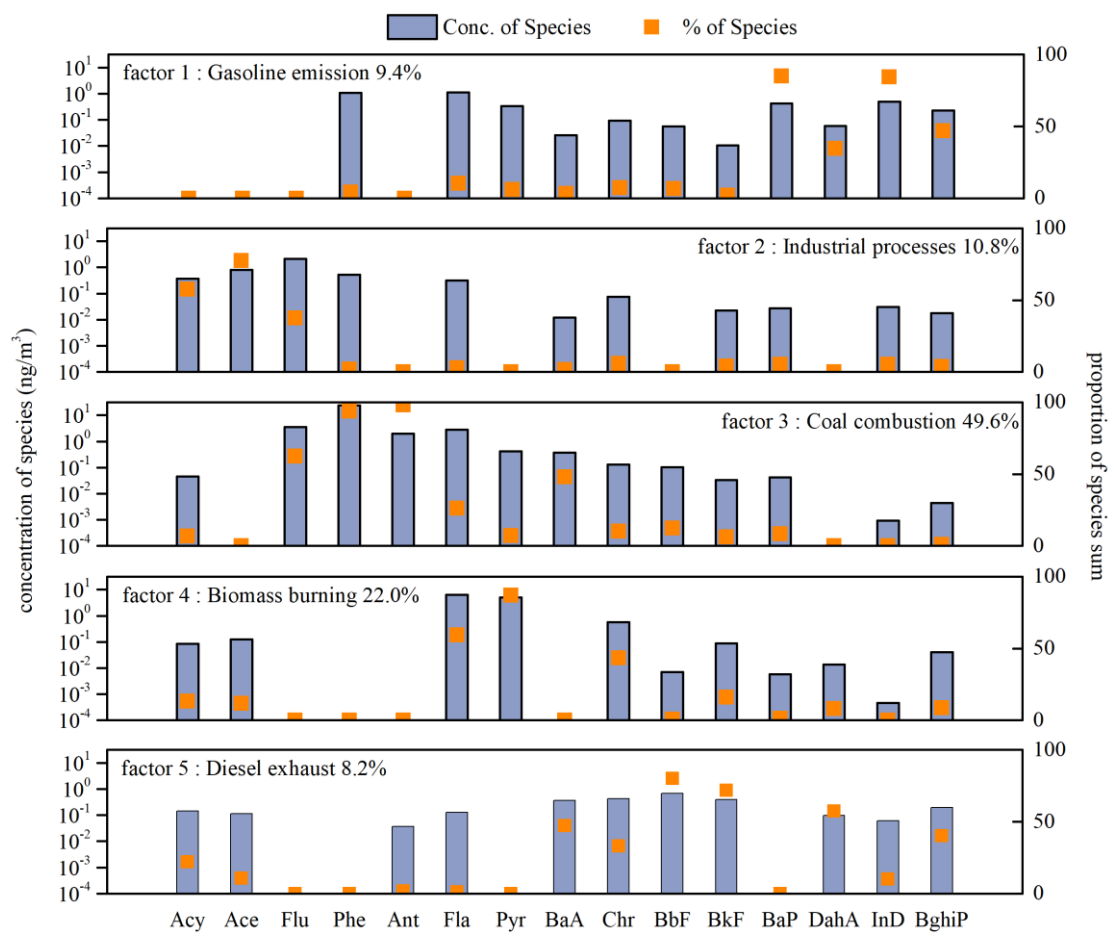

**Fig. S5.** Factor profiles of PAHs by the PMF model.

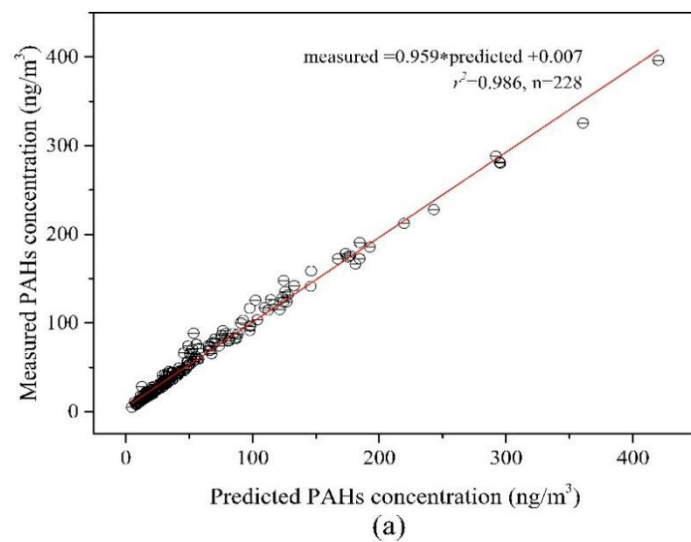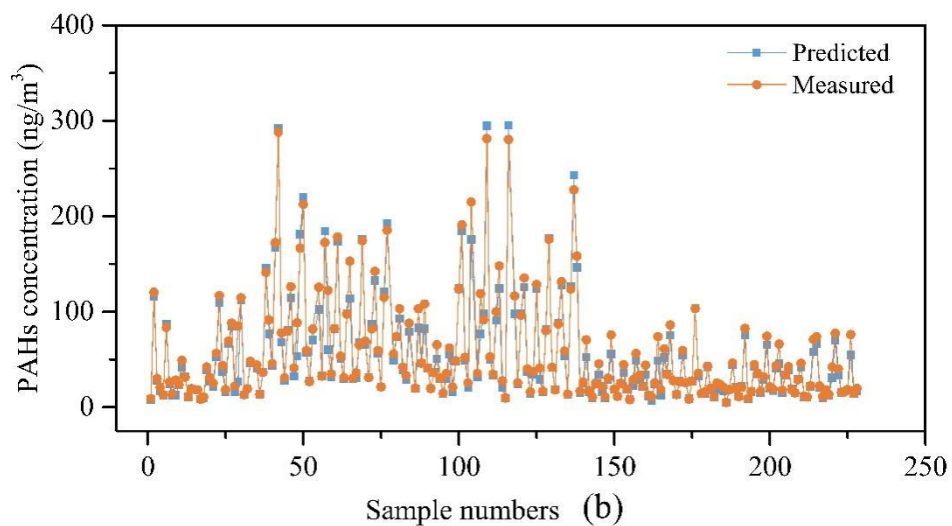

**Fig. S6.** The relationship between predicted and measured concentrations of 228 samples analyzed by PMF (a) and (b).



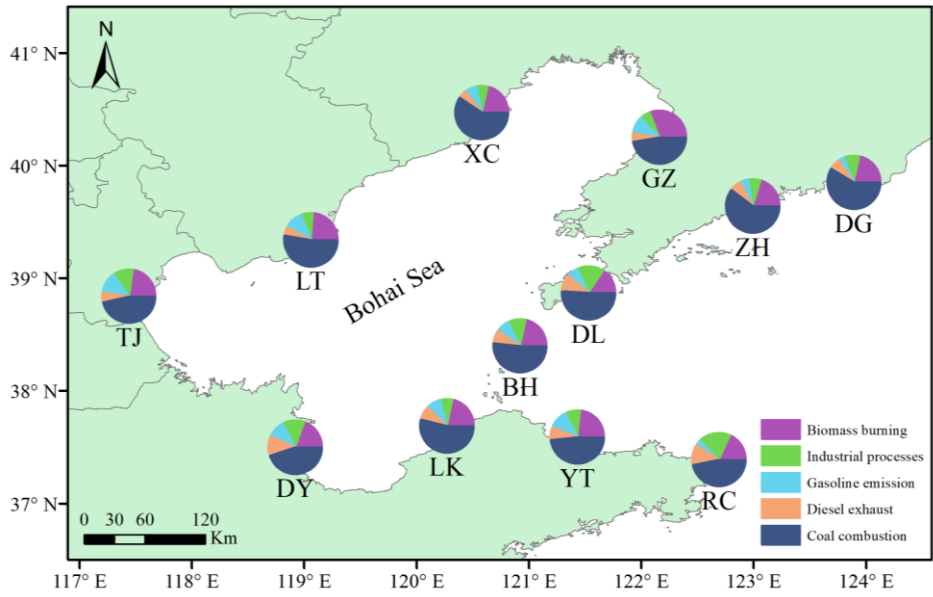

**Fig. S7.** The average contributions of the five sources of PAHs at 12 sites around the BS.

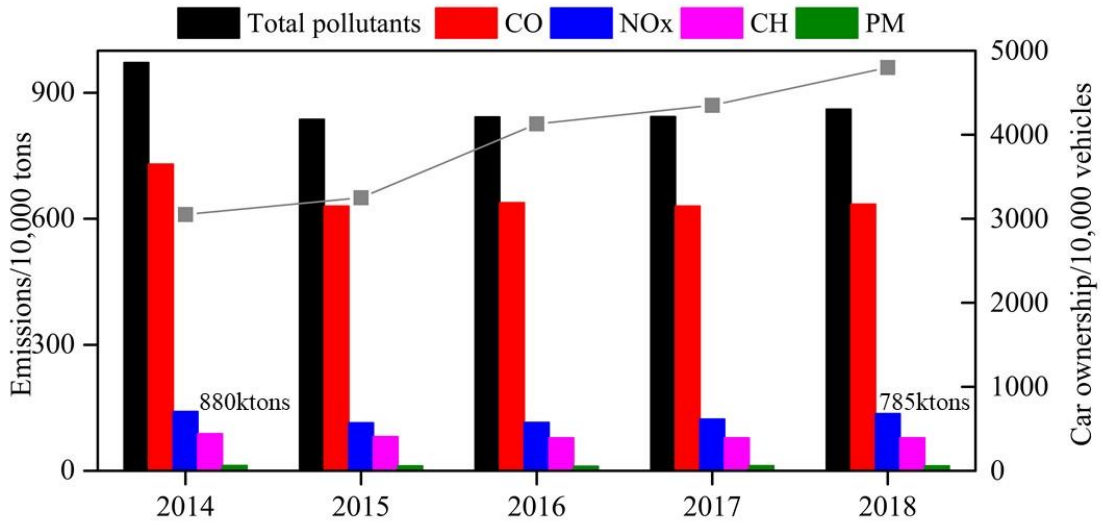

**Fig. S8.** The pollutants emissions of motor vehicle around the BS within five years.

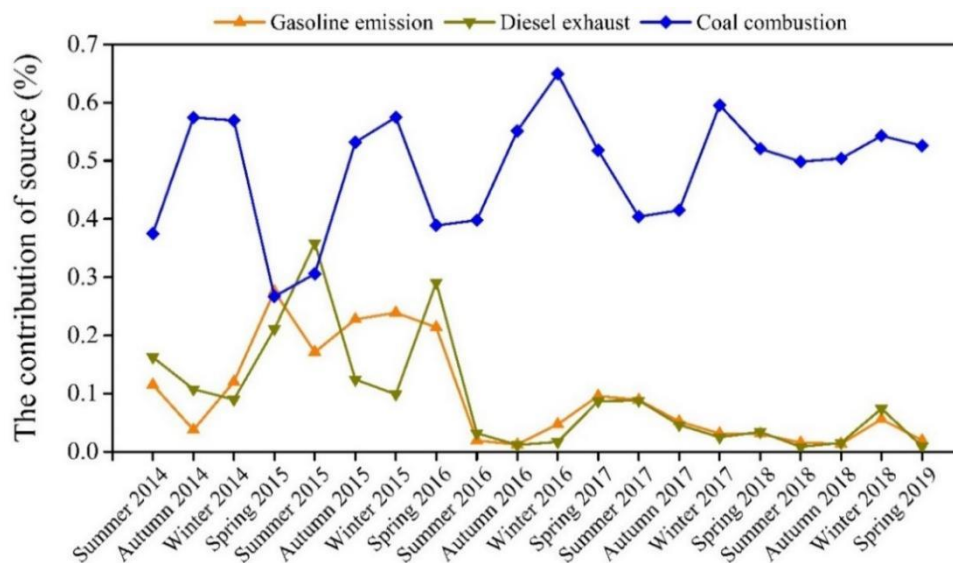

Fig. S9. Seasonal contribution of coal combustion and vehicle emission for PAHs around the BS.

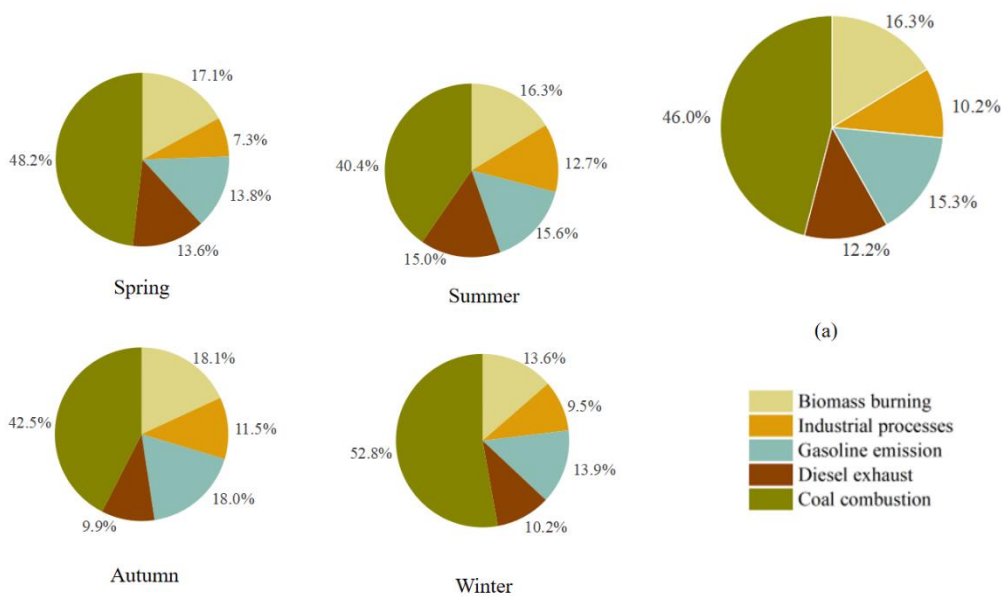

Fig. S10. The seasonal and average contributions for five sources of  $\Sigma_{15}$  PAHs derived from PMF of TJ; (a): the five-year average contributions of five sources.

## References

- Chen, P.F., Li, C.L., Kang, S.C., Yan, F.P., Zhang, Q.G., Ji, Z.M., Tripathee, L., Rupakheti, D., Rupakheti, M., Qu, B., and Sillanpaa, M.: Source apportionment of particle-bound polycyclic aromatic hydrocarbons in Lumbini, Nepal by using the positive matrix factorization receptor model, *Atmos. Res.*, 182, 46–53, <https://doi.org/10.1016/j.atmosres.2016.07.011>, 2016.
- Chueinta, W., Hopke, P.K., and Paatero, P.: Investigation of sources of atmospheric aerosol at urban and suburban residential areas in Thailand by positive matrix factorization, *Atmos. Environ.*, 34, 3319–3329, [https://doi.org/10.1016/s1352-2310\(99\)00433-1](https://doi.org/10.1016/s1352-2310(99)00433-1), 2000.
- Gong, P., Wang, X.P., Sheng, J.J., Wang, H.L., Yuan, X.H., He, Y.Q., Qian, Y., and Yao, T.D.: Seasonal variations and sources of atmospheric polycyclic aromatic hydrocarbons and organochlorine compounds in a high-altitude city: Evidence from four-year observations, *Environ. Pollut.*, 233, 1188–1197, <https://doi.org/10.1016/j.envpol.2017.10.064>, 2018.
- Guariero, A.L.N., Santos, J.V.D., Eiguren-Fernandez, A., Torres, E.A., da Rocha, G.O., and de Andrade, J.B.: Redox activity and PAH content in size-classified nanoparticles emitted by a diesel engine fuelled with biodiesel and diesel blends, *Fuel.*, 116, 490–497, <https://doi.org/10.1016/j.fuel.2013.08.029>, 2014.
- He, L.Y., Hu, M., Zhang, Y.H., Huang, X.F., and Yao, T.T.: Fine particle emissions from on-road vehicles in the Zhujiang Tunnel, China, *Environ. Sci. Technol.*, 42, 4461–4466, <https://doi.org/10.1021/es7022658>, 2008.
- Huang, W., Huang, B., Bi, X.H., Lin, Q.H., Liu, M., Ren, Z.F., Zhang, G.H., Wang, X.M., Sheng, G.Y., and Fu, J.M.: Emission of PAHs, NPAHs and OPAHs from residential honeycomb coal briquette combustion, *Energ. Fuel.*, 28, 636–642. <https://doi.org/10.1021/ef401901d>, 2014.
- Jenkins, B.M., Jones, A.D., Turn, S.Q., and Williams, R.B.: Emission factors for polycyclic aromatic hydrocarbons from biomass burning, *Environ. Sci. Technol.*, 30, 2462–2469, <https://doi.org/10.1021/es950699m>, 1996.
- Kim, E., Hopke, P.K., Larson, T.V., and Covert, D.S.: Analysis of ambient particle size distributions using unmix and positive matrix factorization, *Environ. Sci. Technol.*, 38, 202–209, <https://doi.org/10.1021/es030310s>, 2004.
- Kong, S.F., Ji, Y.Q., Li, Z.Y., Lu, B., and Bai, Z.P.: Emission and profile characteristic of polycyclic aromatic hydrocarbons in PM<sub>2.5</sub> and PM<sub>10</sub> from stationary sources based on dilution sampling, *Atmos. Environ.*, 77, 155–165, <https://doi.org/10.1016/j.atmosenv.2013.04.073>, 2013.
- Ma, W.L., Li, Y.F., Qi, H., Sun, D.Z., Liu, L.Y., and Wang, D.G.: Seasonal variations of sources of

- polycyclic aromatic hydrocarbons (PAHs) to a northeastern urban city, China, *Chemosphere.*, 79, 441–447, <https://doi.org/10.1016/j.chemosphere.2010.01.048>, 2010.
- Nisbet, I.C.T., and Lagoy, P.K.: Toxic Equivalency Factors (TEFS) for Polycyclic Aromatic-Hydrocarbons (PAHS), *Regul. Toxicol. Pharm.*, 16, 290–300, [https://doi.org/10.1016/0273-2300\(92\)90009-x](https://doi.org/10.1016/0273-2300(92)90009-x), 1992.
- Ray, D., Chatterjee, A., Majumdar, D., Ghosh, S.K., and Raha, S.: Polycyclic aromatic hydrocarbons over a tropical urban and a high latitude Himalayan Station in India: Temporal variation and source apportionment, *Atmos. Res.*, 197, 331–341, <https://doi.org/10.1016/j.atmosres.2017.07.010>, 2017.
- Riddle, S.G., Jakober, C.A., Robert, M.A., Cahill, T.M., Charles, M.J., and Kleeman, M.J.: Large PAHs detected in fine particulate matter emitted from light-duty gasoline vehicles, *Atmos. Environ.*, 41, 8658–8668, <https://doi.org/10.1016/j.atmosenv.2007.07.023>, 2007.
- Shen, H., Huang, Y., Wang, R., Zhu, D., Li, W., Shen, G., Wang, B., Zhang, Y., Chen, Y., Lu, Y., Chen, H., Li, T., Sun, K., Li, B., Liu, W., Liu, J., and Tao, S.: Global atmospheric emissions of polycyclic aromatic hydrocarbons from 1960 to 2008 and future predictions, *Environ. Sci. Technol.*, 47, 6415–6424, <https://doi.org/10.1021/es400857z>, 2013.
- Tobiszewski, M., and Namiesnik, J.: PAH diagnostic ratios for the identification of pollution emission sources, *Environ. Pollut.*, 162, 110–119, <https://doi.org/10.1016/j.envpol.2011.10.025>, 2012.
- Wang, D.G., Tian, F.L., Yang, M., Liu, C.L., and Li, Y.F.: Application of positive matrix factorization to identify potential sources of PAHs in soil of Dalian, China, *Environ. Pollut.*, 157, 1559–1564, <https://doi.org/10.1016/j.envpol.2009.01.003>, 2009.
- Westerholm, R., Christensen, A., Tornqvist, M., Ehrenberg, L., Rannug, U., Sjogren, M., Rafter, J., Soontjens, C., Almen, J., and Gragg, K.: Comparison of exhaust emissions from Swedish environmental classified diesel fuel (MK1) and European Program on Emissions, Fuels and Engine Technologies (EPEFE) reference fuel: A chemical and biological characterization with viewpoints on cancer risk, *Environ. Sci. Technol.*, 35, 1748–1754, <https://doi.org/10.1021/es000113i>, 2001.
- Wu, D., Wang, Z.S., Chen, J.H., Kong, S.F., Fu, X., Deng, H.B., Shao, G.F., and Wu, G.: Polycyclic aromatic hydrocarbons (PAHs) in atmospheric PM<sub>2.5</sub> and PM<sub>10</sub> at a coal-based industrial city: Implication for PAH control at industrial agglomeration regions, China, *Atmos. Res.*, 149, 217–229, <https://doi.org/10.1016/j.atmosres.2014.06.012>, 2014.

- Yunker, M.B., Macdonald, R.W., Vingarzan, R., Mitchell, R.H., Goyette, D., and Sylvestre, S.: PAHs in the Fraser River basin: a critical appraisal of PAH ratios as indicators of PAH source and composition, *Org. Geochem.*, 33, 489–515, [https://doi.org/10.1016/s0146-6380\(02\)00002-5](https://doi.org/10.1016/s0146-6380(02)00002-5), 2002.
- Zhu, L.Z., Wang, J., Du, Y., and Xu, Q.Q.: Research on PAHs fingerprints of vehicle discharges, *Environmental Science (China)*, 3, 26–29, <https://doi.org/10.13227/j.hjcx.2003.03.005>, 2003.
- Zhu, Y., Yang, L., Yuan, Q., Yan, C., Dong, C., Meng, C., Sui, X., Yao, L., Yang, F., Lu, Y., and Wang, W.: Airborne particulate polycyclic aromatic hydrocarbon (PAH) pollution in a background site in the North China Plain: concentration, size distribution, toxicity and sources, *Sci. Total. Environ.*, 466-467, 357–368, <https://doi.org/10.1016/j.scitotenv.2013.07.030>, 2014.
